# Supplementary material for: Aldosterone Predicts Cardiovascular, Renal, and Metabolic Disease in the General Community: A 4‐Year Follow‐Up
Source: PubMed Central journal article supplement — J Am Heart Assoc. 2015 Dec 23;4(12):e002505. doi: 10.1161/JAHA.115.002505 (PMC4845260; doi:10.1161/jaha.115.002505), 2015-12-23
Supplement: JAH3-4-e002505-s001.pdf [file JAH3-4-e002505-s001.pdf]

# **SUPPLEMENTAL MATERIAL**

**Figure S1: ROC Curves for Aldosterone at Visit 1 Predictor of Disease at Visit 2.**

ROC curves showing the association between aldosterone at Visit 1 and new onset a) HTN, b) central obesity and c) diabetes at Visit 2. Aldosterone does not add significantly to the model's ability to discriminate subjects who will and will not develop disease at Visit 2. AUC = area under the curve.

**Figure S1: ROC Curves for Aldosterone at Visit 1 Predictor of Disease at Visit 2**

**a) New Hypertension**

ROC Curves for comparison

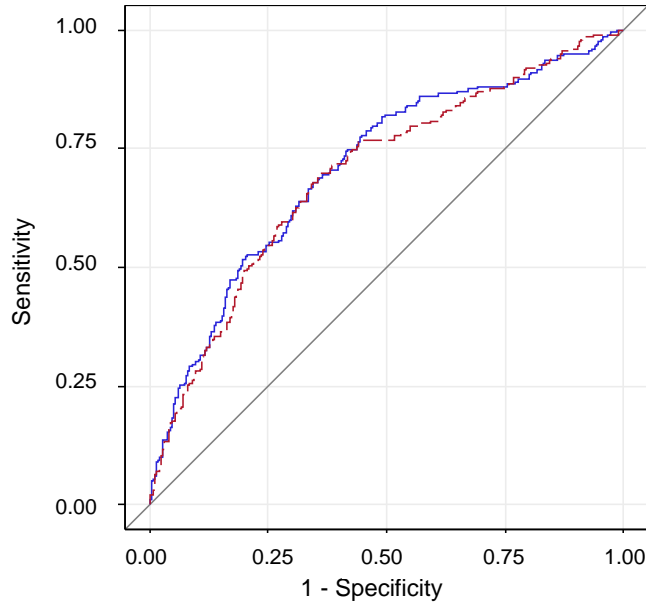

ROC Curve (Area)  
— Model (0.7086), - - - Base (0.6954)

**Red curve**, baseline (age, gender and BMI):  
AUC= 0.695 (0.653, 0.738).  
**Blue curve**, baseline + aldosterone continuous variable:  
AUC= 0.709 (0.667, 0.751).  
P= 0.090

ROC Curves for comparison

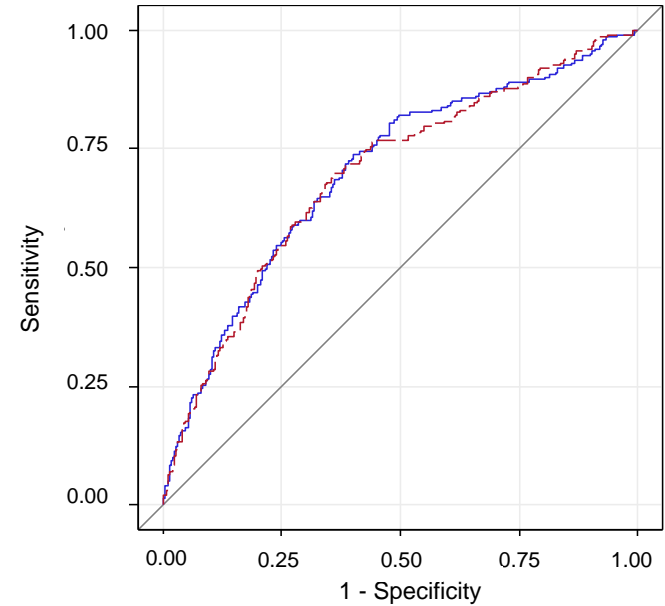

ROC Curve (Area)  
— Model (0.7017), - - - Base (0.6954)

**Red curve**, baseline (age, gender and BMI):  
AUC= 0.695 (0.653, 0.738).  
**Blue curve**, baseline + aldosterone 3<sup>rd</sup> tertile:  
AUC= 0.702 (0.660, 0.744).  
P= 0.220

## b) New Central Obesity

ROC Curves for comparison

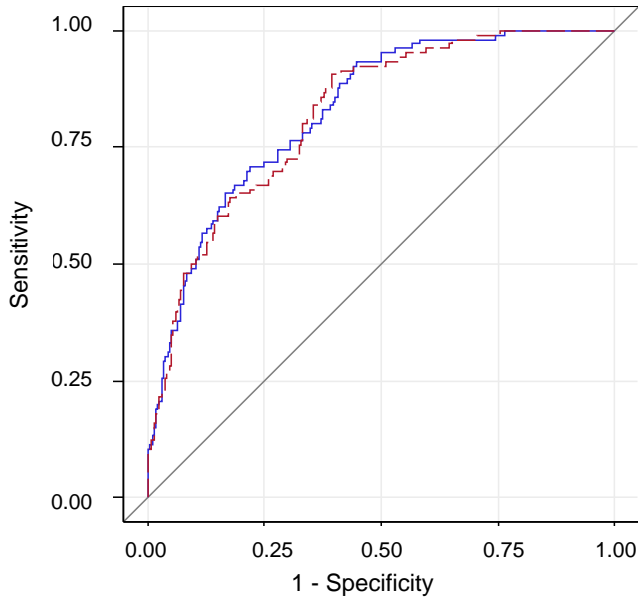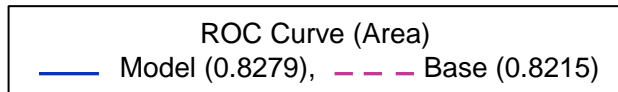

Red curve, baseline (age, gender and BMI):

AUC= 0.822 (0.783, 0.860).

Blue curve, baseline + aldosterone continuous variable:

AUC= 0.828 (0.790, 0.866).

P= 0.350

ROC Curves for comparison

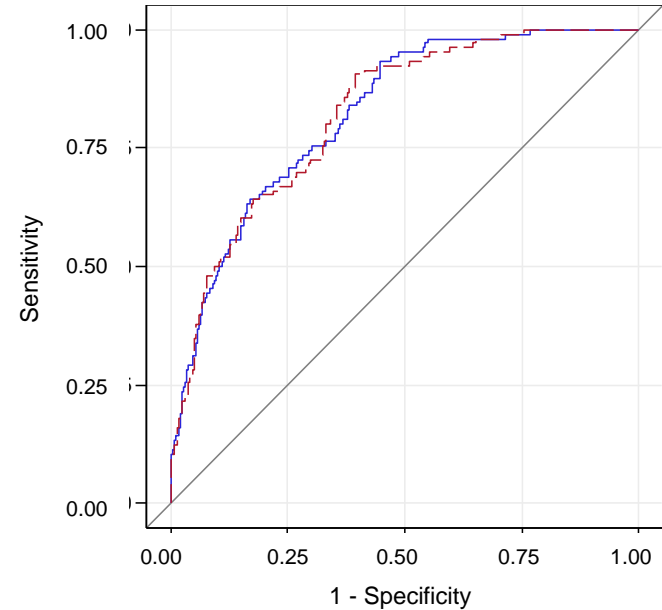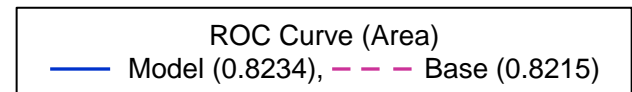

Red curve, baseline (age, gender and BMI):

AUC= 0.822 (0.783, 0.860).

Blue curve, baseline + aldosterone 3<sup>rd</sup> tertile:

AUC= 0.823 (0.785, 0.862).

P= 0.650

### c) New Diabetes

ROC Curves for comparison

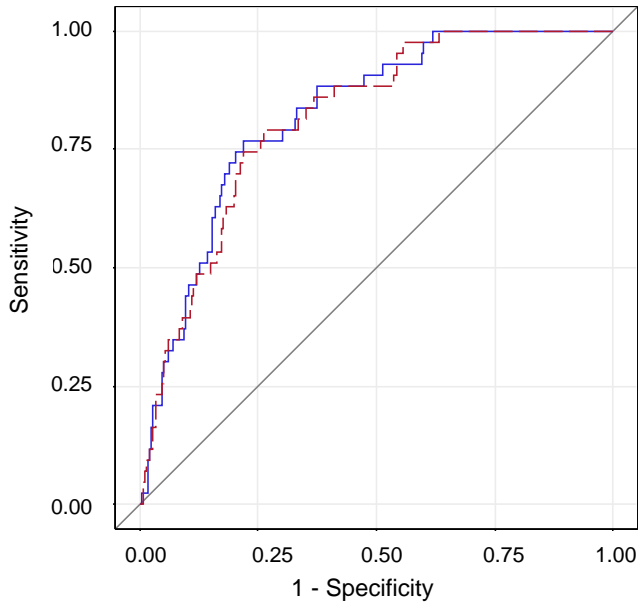

ROC Curve (Area)  
— Model (0.8222), - - - Base (0.8150)

Red curve, baseline (age, gender and BMI):  
AUC= 0.815 (0.761, 0.869).  
Blue curve, baseline + aldosterone continuous variable:  
AUC=0.822 (0.761, 0.869).  
P= 0.450

ROC Curves for comparison

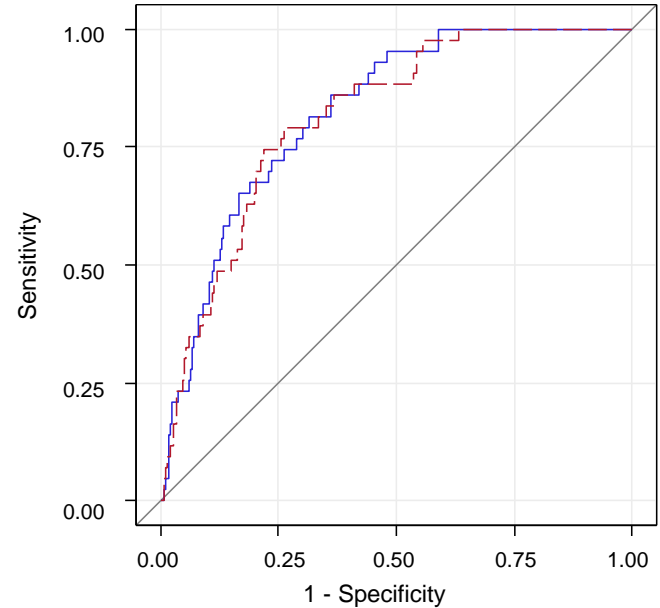

ROC Curve (Area)  
— Model (0.8236), - - - Base (0.8150)

Red curve, baseline (age, gender and BMI):  
AUC= 0.815 (0.761, 0.869).  
Blue curve, baseline + aldosterone 3<sup>rd</sup> tertile:  
AUC= 0.824 (0.772, 0.875).  
P= 0.480

**Figure S2: ROC Curves for the Associations between Aldosterone at Visit 2 and Disease at Visit 2.**

ROC curves showing the association between aldosterone at Visit 2 with a) HTN, b) obesity and c) chronic kidney disease at Visit 2. Aldosterone does add significantly to the model's ability to discriminate disease and absence of disease. AUC = area under the curve.

**Figure S2:** ROC Curves for the Associations between Aldosterone at Visit 2 and Disease at Visit 2.

**a) Hypertension**

ROC Curves for comparison

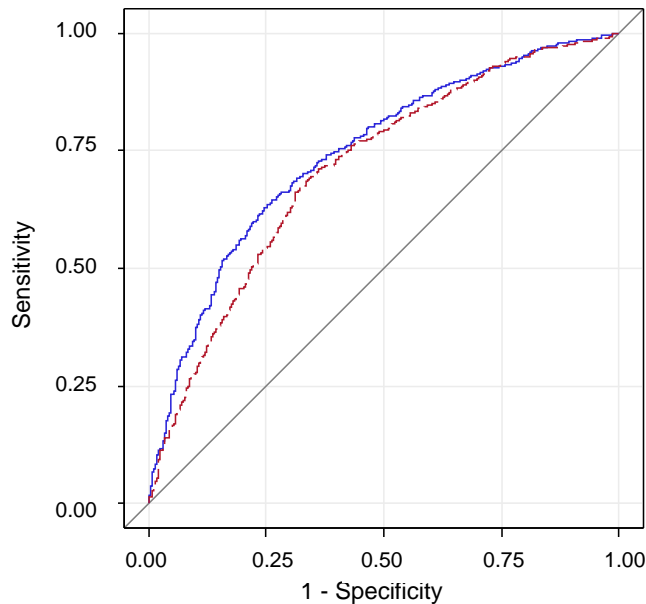

ROC Curve (Area)  
— Model (0.7440), - - - Base (0.7119)

**Red curve**, baseline (age, gender and BMI):  
AUC= 0.712 (0.685, 0.739).  
**Blue curve**, baseline + aldosterone continuous variable:  
AUC= 0.744 (0.718, 0.770).  
P<0.001

ROC Curves for comparison

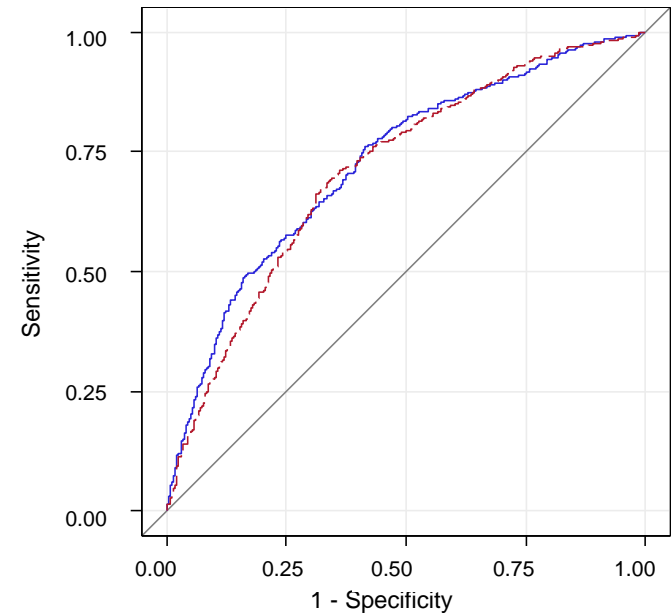

ROC Curve (Area)  
— Model (0.7253), - - - Base (0.7119)

**Red curve**, baseline (age, gender and BMI):  
AUC= 0.712 (0.685, 0.739).  
**Blue curve**, baseline + aldosterone 3<sup>rd</sup> tertile:  
AUC= 0.725 (0.698, 0.752).  
P= 0.020

## b) Obesity

### ROC Curves for comparison

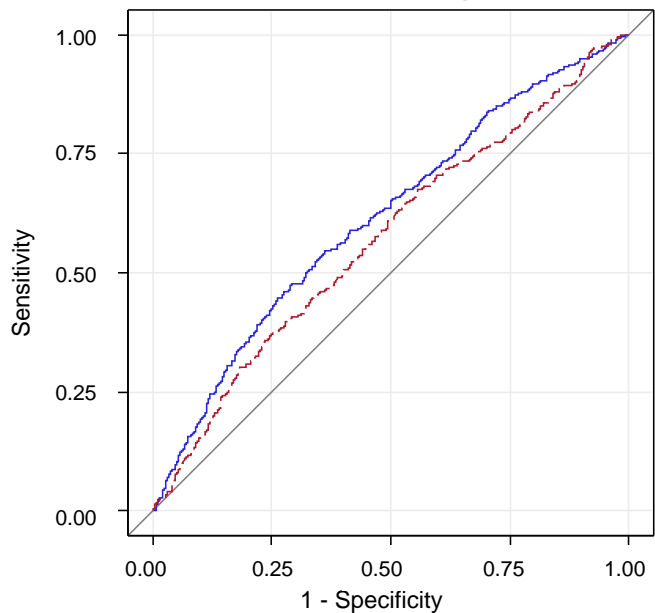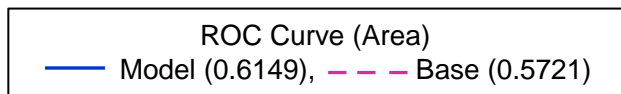

**Red curve**, baseline (age, gender and BMI):  
AUC= 0.572 (0.539, 0.605).  
**Blue curve**, baseline + aldosterone continuous variable:  
AUC= 0.615 (0.583, 0.647).  
P= 0.003

### ROC Curves for comparison

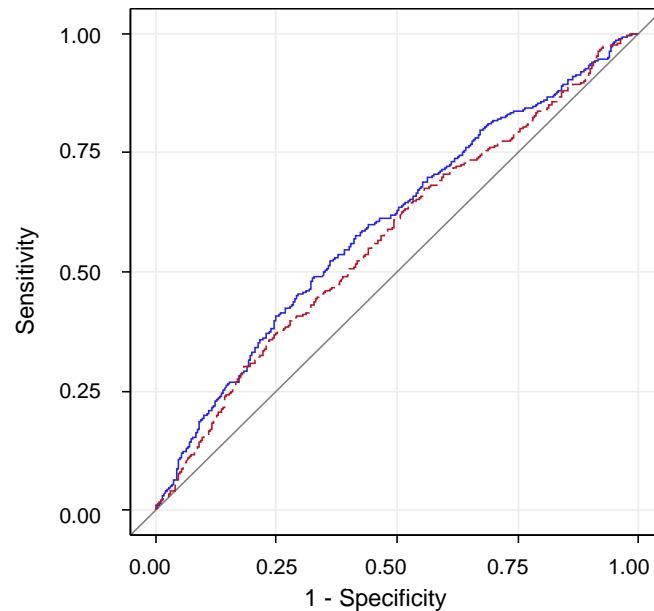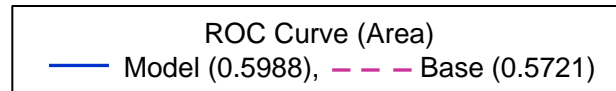

**Red curve**, baseline (age, gender and BMI):  
AUC= 0.572 (0.539, 0.605).  
**Blue curve**, baseline + aldosterone 3<sup>rd</sup> tertile:  
AUC= 0.599 (0.566, 0.631).  
P= 0.030



### c) Chronic Kidney Disease

ROC Curves for comparison

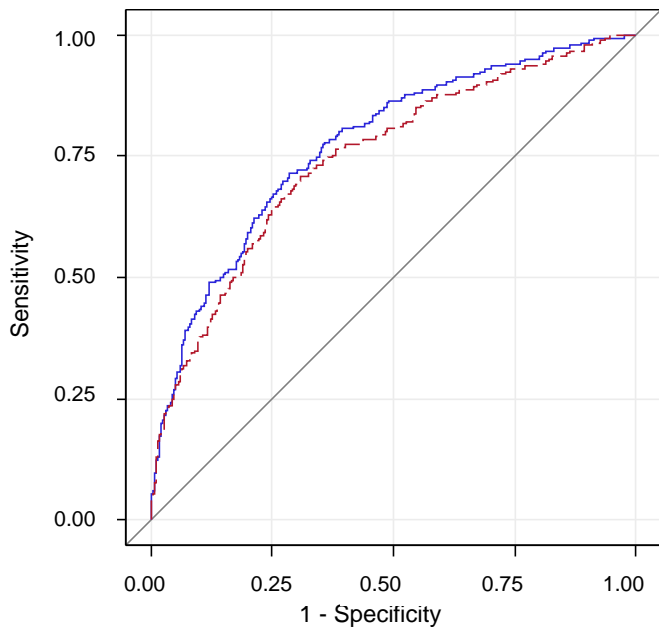

ROC Curve (Area)  
— Model (0.7738), - - - Base (0.7458)

Red curve, baseline (age, gender and BMI):

AUC= 0.746 (0.707, 0.785).

Blue curve, baseline + aldosterone continuous variable:

AUC= 0.774 (0.737, 0.810).

P= 0.002

ROC Curves for comparison

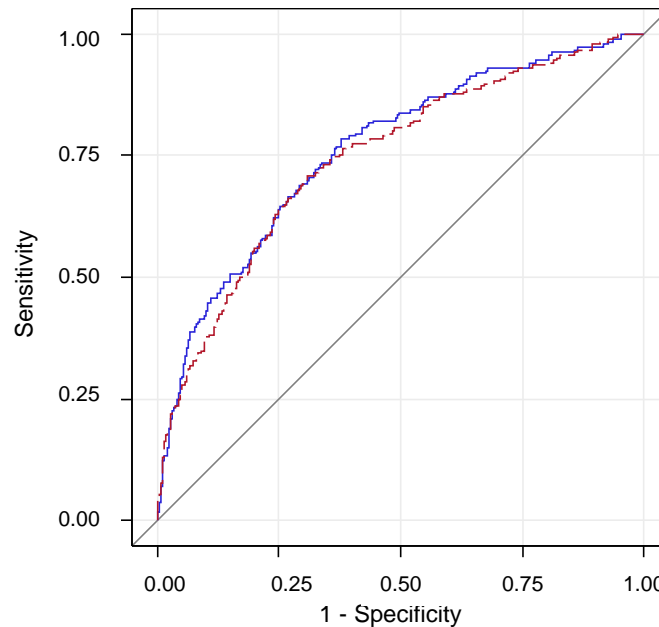

ROC Curve (Area)  
— Model (0.7608), - - - Base (0.7458)

Red curve, baseline (age, gender and BMI):

AUC= 0.746 (0.707, 0.785).

Blue curve, baseline + aldosterone 3<sup>rd</sup> tertile:

AUC= 0.761 (0.723, 0.799).

P= 0.030
